# Supplementary material for: Easy access to medium-sized lactones through metal carbene migratory insertion enabled 1,4-palladium shift
Source: PubMed Central journal article supplement (PMC6978448; doi:10.1038/s41467-019-14101-5), 2020-01-23
Supplement: 41467_2019_14101_MOESM4_ESM.pdf [file 41467_2019_14101_MOESM4_ESM.pdf]

## Int1

|    |           |           |           |   |           |           |           |
|----|-----------|-----------|-----------|---|-----------|-----------|-----------|
| Pd | 0.057257  | -0.559010 | 0.214920  | C | 5.145172  | -2.890905 | -2.298888 |
| Br | -1.881379 | -3.323028 | 0.134593  | H | 5.813664  | -3.629025 | -2.734145 |
| P  | 2.231981  | 0.244313  | -0.454936 | C | 5.598084  | -1.589064 | -2.064309 |
| P  | -1.353922 | 0.887213  | -1.118057 | H | 6.618838  | -1.313837 | -2.316928 |
| C  | 3.240316  | 1.084033  | 0.845033  | C | 4.742842  | -0.640795 | -1.503861 |
| C  | 3.153961  | 2.468199  | 1.067589  | H | 5.109492  | 0.364760  | -1.314685 |
| H  | 2.538957  | 3.090751  | 0.425295  | C | -1.243253 | 2.647924  | -0.555435 |
| C  | 3.849668  | 3.066361  | 2.121014  | C | -1.732419 | 3.724002  | -1.316553 |
| H  | 3.773395  | 4.140212  | 2.271922  | H | -2.215030 | 3.540472  | -2.272842 |
| C  | 4.640910  | 2.294373  | 2.971958  | C | -1.625488 | 5.033871  | -0.849327 |
| H  | 5.183143  | 2.761246  | 3.789725  | H | -2.009160 | 5.854371  | -1.450124 |
| C  | 4.729656  | 0.915438  | 2.764782  | C | -1.032956 | 5.290254  | 0.390626  |
| H  | 5.344481  | 0.304027  | 3.420342  | H | -0.952039 | 6.311251  | 0.754198  |
| C  | 4.033432  | 0.316181  | 1.715870  | C | -0.551707 | 4.231068  | 1.160806  |
| H  | 4.117925  | -0.756384 | 1.563850  | H | -0.095014 | 4.420579  | 2.128474  |
| C  | 3.421223  | -0.980687 | -1.167205 | C | -0.655927 | 2.918953  | 0.689708  |
| C  | 2.979162  | -2.290108 | -1.405934 | H | -0.277757 | 2.091424  | 1.285493  |
| H  | 1.958493  | -2.560802 | -1.146026 | C | -3.181340 | 0.617743  | -1.236877 |
| C  | 3.835155  | -3.240140 | -1.969928 | C | -3.658373 | -0.490165 | -1.960077 |
| H  | 3.477444  | -4.250820 | -2.147657 | H | -2.962664 | -1.144033 | -2.479581 |

|            |           |           |           |   |           |           |           |
|------------|-----------|-----------|-----------|---|-----------|-----------|-----------|
| C          | -5.020730 | -0.783510 | -2.001240 | C | 3.021213  | -3.709315 | -1.635883 |
| H          | -5.368060 | -1.643259 | -2.568197 | H | 2.691564  | -4.744944 | -1.658822 |
| C          | -5.932855 | 0.013524  | -1.304761 | C | 3.859692  | -3.218231 | -2.638281 |
| H          | -6.993624 | -0.220347 | -1.329147 | H | 4.186972  | -3.867785 | -3.445574 |
| C          | -5.469828 | 1.102784  | -0.566794 | C | 4.274163  | -1.885271 | -2.595090 |
| H          | -6.168150 | 1.721531  | -0.009926 | H | 4.928822  | -1.492261 | -3.368734 |
| C          | -4.106322 | 1.403531  | -0.532029 | C | 3.856992  | -1.050687 | -1.557095 |
| H          | -3.766882 | 2.254519  | 0.049185  | H | 4.195419  | -0.018742 | -1.533479 |
| C          | -1.128462 | -1.937354 | 1.433603  | C | 3.794859  | 0.723795  | 1.089523  |
| C          | -2.036803 | -1.330435 | 2.366196  | C | 3.578355  | 2.108516  | 1.115839  |
| C          | -1.533769 | -0.864937 | 3.575416  | H | 2.588615  | 2.498168  | 0.896346  |
| H          | -2.234963 | -0.370770 | 4.241944  | C | 4.626603  | 2.985175  | 1.411622  |
| C          | -0.181365 | -1.026571 | 3.931644  | H | 4.444328  | 4.056392  | 1.425583  |
| C          | 0.683628  | -1.672984 | 3.067855  | C | 5.900381  | 2.486558  | 1.683240  |
| H          | 1.714548  | -1.858728 | 3.359047  | H | 6.715711  | 3.167740  | 1.912414  |
| C          | 0.238595  | -2.155054 | 1.805103  | C | 6.128254  | 1.107015  | 1.656565  |
| H          | 0.830626  | -2.904752 | 1.290805  | H | 7.120221  | 0.714273  | 1.864739  |
| H          | 0.170782  | -0.670970 | 4.895690  | C | 5.083899  | 0.231957  | 1.361762  |
| C          | -3.476733 | -1.126358 | 2.080670  | H | 5.273817  | -0.837793 | 1.333815  |
| O          | -4.253624 | -0.605454 | 2.865566  | C | -2.146007 | -2.189599 | 0.669863  |
| H          | -3.824977 | -1.473427 | 1.091335  | C | -3.016582 | -3.025246 | 1.391608  |
| C          | -0.867098 | 0.970466  | -2.945169 | H | -3.482733 | -2.666455 | 2.305377  |
| H          | -0.826410 | 2.020005  | -3.260651 | C | -3.310123 | -4.311315 | 0.939049  |
| H          | -1.698772 | 0.517573  | -3.494122 | H | -3.985777 | -4.943371 | 1.509571  |
| C          | 0.435335  | 0.238734  | -3.328799 | C | -2.740113 | -4.784365 | -0.246413 |
| H          | 0.354546  | -0.047373 | -4.386424 | H | -2.968976 | -5.786888 | -0.598405 |
| H          | 0.500940  | -0.700847 | -2.766842 | C | -1.881191 | -3.962859 | -0.976375 |
| C          | 1.748258  | 1.031012  | -3.191986 | H | -1.438331 | -4.320021 | -1.902378 |
| H          | 1.699925  | 1.903450  | -3.859604 | C | -1.586242 | -2.674410 | -0.521415 |
| H          | 2.559402  | 0.400816  | -3.577032 | H | -0.915869 | -2.038154 | -1.092434 |
| C          | 2.151379  | 1.548769  | -1.797658 | C | -3.348376 | 0.361667  | 1.337803  |
| H          | 3.122262  | 2.054146  | -1.875780 | C | -3.429874 | 1.587560  | 2.023959  |
| H          | 1.429063  | 2.296542  | -1.450583 | H | -2.550543 | 1.994509  | 2.518746  |
|            |           |           |           | C | -4.623648 | 2.304890  | 2.067437  |
|            |           |           |           | H | -4.665724 | 3.248223  | 2.605538  |
| <b>TS1</b> |           |           |           | C | -5.756176 | 1.822310  | 1.406969  |
|            |           |           |           | H | -6.683158 | 2.388352  | 1.427466  |
| Pd         | 0.161410  | 0.486443  | 0.031934  | C | -5.683454 | 0.618480  | 0.708032  |
| Br         | 0.433102  | 3.025779  | -1.154134 | H | -6.555439 | 0.241323  | 0.180469  |
| P          | 2.361845  | -0.396265 | 0.762294  | C | -4.490855 | -0.107576 | 0.672887  |
| P          | -1.704016 | -0.482137 | 1.240441  | H | -4.453701 | -1.041135 | 0.121440  |
| C          | 3.020102  | -1.535822 | -0.537706 | C | -0.673098 | 1.234847  | -1.834019 |
| C          | 2.602028  | -2.875675 | -0.597521 | C | -2.054711 | 1.401216  | -2.086367 |
| H          | 1.939337  | -3.276943 | 0.164283  | C | -2.644133 | 0.605893  | -3.079434 |

|             |           |           |           |   |           |           |           |
|-------------|-----------|-----------|-----------|---|-----------|-----------|-----------|
| H           | -3.712550 | 0.727353  | -3.234696 | C | 3.562947  | -3.118149 | -2.077854 |
| C           | -1.894279 | -0.290838 | -3.837827 | H | 3.190785  | -4.109872 | -2.319516 |
| C           | -0.512358 | -0.372550 | -3.637704 | C | 4.894112  | -2.786045 | -2.331980 |
| H           | 0.094664  | -1.028726 | -4.256668 | H | 5.563294  | -3.517884 | -2.776997 |
| C           | 0.115437  | 0.421506  | -2.673262 | C | 5.368920  | -1.512745 | -2.006083 |
| H           | 1.195697  | 0.422110  | -2.580171 | H | 6.406800  | -1.251389 | -2.195615 |
| H           | -2.373162 | -0.891056 | -4.605988 | C | 4.512119  | -0.574595 | -1.431025 |
| C           | -2.904113 | 2.379041  | -1.365990 | H | 4.892919  | 0.409122  | -1.169650 |
| O           | -4.073400 | 2.587425  | -1.642117 | C | -1.295593 | 2.634303  | -0.295887 |
| H           | -2.402526 | 2.939791  | -0.557085 | C | -1.804122 | 3.730509  | -1.015357 |
| C           | 2.382521  | -1.484091 | 2.309325  | H | -2.331510 | 3.573509  | -1.952363 |
| H           | 2.868831  | -0.900594 | 3.099576  | C | -1.656520 | 5.028405  | -0.527532 |
| H           | 3.016824  | -2.357955 | 2.122260  | H | -2.053812 | 5.865934  | -1.094675 |
| C           | 0.973712  | -1.903588 | 2.760105  | C | -1.004146 | 5.250809  | 0.688974  |
| H           | 1.055889  | -2.722181 | 3.487658  | H | -0.890186 | 6.263127  | 1.067296  |
| H           | 0.428689  | -2.319182 | 1.904748  | C | -0.502862 | 4.170616  | 1.415390  |
| C           | 0.179315  | -0.733325 | 3.381441  | H | 0.007768  | 4.333643  | 2.360176  |
| H           | 0.589346  | 0.218088  | 3.021002  | C | -0.647912 | 2.869341  | 0.926153  |
| H           | 0.323276  | -0.734596 | 4.470658  | H | -0.249732 | 2.028726  | 1.488902  |
| C           | -1.323717 | -0.739016 | 3.075145  | C | -3.315831 | 0.651003  | -0.894157 |
| H           | -1.793185 | -1.668533 | 3.417686  | C | -3.860188 | -0.406484 | -1.642491 |
| H           | -1.810882 | 0.079081  | 3.615968  | H | -3.207711 | -1.067353 | -2.205994 |
|             |           |           |           | C | -5.235513 | -0.633589 | -1.652338 |
|             |           |           |           | H | -5.639970 | -1.453548 | -2.239727 |
|             |           |           |           | C | -6.088276 | 0.183121  | -0.906297 |
|             |           |           |           | H | -7.160261 | 0.005774  | -0.914909 |
|             |           |           |           | C | -5.554692 | 1.221945  | -0.143849 |
|             |           |           |           | H | -6.208877 | 1.857992  | 0.446491  |
|             |           |           |           | C | -4.177405 | 1.454115  | -0.134133 |
|             |           |           |           | H | -3.780112 | 2.266951  | 0.464306  |
|             |           |           |           | C | -1.784425 | -1.456621 | 1.141060  |
|             |           |           |           | C | -2.332978 | -2.637917 | 0.591798  |
|             |           |           |           | C | -3.380672 | -3.311292 | 1.251674  |
|             |           |           |           | H | -3.773275 | -4.229375 | 0.816557  |
|             |           |           |           | C | -3.911976 | -2.816331 | 2.435246  |
|             |           |           |           | C | -3.382062 | -1.638665 | 2.972115  |
|             |           |           |           | H | -3.782315 | -1.239857 | 3.901930  |
|             |           |           |           | C | -2.330252 | -0.973246 | 2.334557  |
|             |           |           |           | H | -1.921022 | -0.078382 | 2.795374  |
|             |           |           |           | H | -4.721823 | -3.337212 | 2.938326  |
|             |           |           |           | C | -1.875364 | -3.218496 | -0.676267 |
|             |           |           |           | O | -1.090305 | -2.721083 | -1.475641 |
|             |           |           |           | H | -2.333469 | -4.204176 | -0.914487 |
|             |           |           |           | C | 1.875159  | 1.564373  | -1.910200 |
| <b>Int2</b> |           |           |           |   |           |           |           |
| Pd          | -0.133360 | -0.576090 | 0.324573  |   |           |           |           |
| Br          | 1.184379  | -2.174607 | 1.892550  |   |           |           |           |
| P           | 1.998701  | 0.346886  | -0.497165 |   |           |           |           |
| P           | -1.485336 | 0.898642  | -0.895483 |   |           |           |           |
| C           | 2.984858  | 1.278943  | 0.751740  |   |           |           |           |
| C           | 3.637309  | 0.569952  | 1.776429  |   |           |           |           |
| H           | 3.566033  | -0.511806 | 1.813802  |   |           |           |           |
| C           | 4.356604  | 1.250403  | 2.758130  |   |           |           |           |
| H           | 4.854830  | 0.685840  | 3.541561  |   |           |           |           |
| C           | 4.432928  | 2.645200  | 2.740868  |   |           |           |           |
| H           | 4.994415  | 3.172027  | 3.507980  |   |           |           |           |
| C           | 3.781791  | 3.358028  | 1.734253  |   |           |           |           |
| H           | 3.834085  | 4.443581  | 1.710485  |   |           |           |           |
| C           | 3.061943  | 2.681197  | 0.746276  |   |           |           |           |
| H           | 2.563283  | 3.260271  | -0.023533 |   |           |           |           |
| C           | 3.170748  | -0.901750 | -1.173053 |   |           |           |           |
| C           | 2.702465  | -2.183575 | -1.496910 |   |           |           |           |
| H           | 1.673956  | -2.455090 | -1.280558 |   |           |           |           |

|             |           |           |           |   |           |           |           |
|-------------|-----------|-----------|-----------|---|-----------|-----------|-----------|
| H           | 1.171875  | 2.345598  | -1.598842 | C | 0.617377  | -1.369407 | 3.567085  |
| H           | 2.849553  | 2.048263  | -2.047300 | H | 1.252273  | -0.952177 | 4.343957  |
| C           | 1.428593  | 0.948935  | -3.247468 | C | 0.224428  | -2.708189 | 3.627667  |
| H           | 1.365052  | 1.767977  | -3.978217 | H | 0.553224  | -3.334835 | 4.452108  |
| H           | 2.214956  | 0.276309  | -3.609441 | C | -0.598973 | -3.237527 | 2.631544  |
| C           | 0.098387  | 0.179844  | -3.249092 | H | -0.915596 | -4.275703 | 2.677363  |
| H           | -0.101987 | -0.117236 | -4.286865 | C | -1.027819 | -2.429350 | 1.578010  |
| H           | 0.183981  | -0.754093 | -2.684154 | H | -1.680743 | -2.839195 | 0.810570  |
| C           | -1.126325 | 0.968855  | -2.747387 | C | -1.074273 | 1.649868  | 0.565981  |
| H           | -1.058492 | 2.023344  | -3.041070 | C | -0.403203 | 2.621446  | -0.193199 |
| H           | -2.026382 | 0.574004  | -3.225896 | H | 0.139253  | 2.346366  | -1.091364 |
|             |           |           |           | C | -0.421640 | 3.961785  | 0.196992  |
|             |           |           |           | H | 0.103926  | 4.700280  | -0.401596 |
|             |           |           |           | C | -1.110794 | 4.349305  | 1.346012  |
|             |           |           |           | H | -1.127974 | 5.393343  | 1.645679  |
| <b>Int3</b> |           |           |           | C | -1.786445 | 3.390970  | 2.105000  |
| Pd          | -3.105990 | -0.900111 | -0.960149 | H | -2.333880 | 3.685907  | 2.995652  |
| Br          | -4.891141 | -2.015729 | -2.318753 | C | -1.773883 | 2.051859  | 1.718254  |
| P           | 5.023076  | -0.632218 | -1.223143 | H | -2.314386 | 1.320174  | 2.310870  |
| P           | -1.156776 | -0.104934 | 0.040960  | C | -4.243422 | -0.090542 | 0.459967  |
| C           | 6.624254  | -1.070718 | -0.391567 | C | -4.838267 | 1.166260  | 0.274852  |
| C           | 6.933926  | -2.436905 | -0.259389 | C | -5.680154 | 1.675209  | 1.281755  |
| H           | 6.226781  | -3.189264 | -0.603071 | H | -6.129696 | 2.649307  | 1.110692  |
| C           | 8.143538  | -2.850148 | 0.296807  | C | -5.924910 | 0.950988  | 2.440988  |
| H           | 8.356700  | -3.911498 | 0.395226  | C | -5.327346 | -0.303257 | 2.607734  |
| C           | 9.083166  | -1.903888 | 0.713730  | H | -5.517065 | -0.884337 | 3.506963  |
| H           | 10.029577 | -2.223787 | 1.141270  | C | -4.485577 | -0.827660 | 1.620929  |
| C           | 8.800251  | -0.546189 | 0.566088  | H | -4.036735 | -1.804677 | 1.763965  |
| H           | 9.527343  | 0.198918  | 0.879222  | H | -6.580297 | 1.350789  | 3.209683  |
| C           | 7.582614  | -0.132210 | 0.019138  | C | -4.618604 | 1.993692  | -0.940131 |
| H           | 7.382155  | 0.929196  | -0.084473 | O | -5.081343 | 3.108306  | -1.095957 |
| C           | 4.919761  | 1.205706  | -0.996979 | H | -3.987293 | 1.522366  | -1.721732 |
| C           | 4.902744  | 1.994337  | -2.158634 | C | 0.184533  | -0.328383 | -1.237178 |
| H           | 4.961152  | 1.510344  | -3.130489 | H | -0.086945 | 0.349714  | -2.054805 |
| C           | 4.807868  | 3.386394  | -2.082722 | H | 0.039411  | -1.339340 | -1.638632 |
| H           | 4.797406  | 3.978410  | -2.994075 | C | 1.656438  | -0.131458 | -0.800483 |
| C           | 4.725947  | 4.012615  | -0.838648 | H | 2.191189  | 0.366131  | -1.618182 |
| H           | 4.650771  | 5.095015  | -0.775686 | H | 1.719485  | 0.554455  | 0.053195  |
| C           | 4.744217  | 3.242625  | 0.327838  | C | 2.364792  | -1.451438 | -0.460775 |
| H           | 4.685602  | 3.725850  | 1.299839  | H | 2.371532  | -2.089929 | -1.355035 |
| C           | 4.841902  | 1.852969  | 0.248538  | H | 1.783459  | -1.987400 | 0.299920  |
| H           | 4.871104  | 1.271155  | 1.165996  | C | 3.803647  | -1.291724 | 0.058072  |
| C           | -0.627756 | -1.084877 | 1.502513  | H | 3.818126  | -0.685380 | 0.972313  |
| C           | 0.195804  | -0.559742 | 2.511041  | H | 4.186754  | -2.279683 | 0.338845  |
| H           | 0.500238  | 0.481438  | 2.478439  |   |           |           |           |

**Int4**

P 4.508372 -0.423693 0.140276  
C 6.225244 -1.093748 -0.078819  
C 7.370007 -0.295670 -0.223258  
H 7.275073 0.783603 -0.283990  
C 8.640534 -0.873514 -0.294245  
H 9.513079 -0.235236 -0.409216  
C 8.792224 -2.258018 -0.221847  
H 9.780764 -2.705515 -0.279572  
C 7.662309 -3.064623 -0.064315  
H 7.767310 -4.144349 0.004487  
C 6.396174 -2.487137 0.017108  
H 5.531682 -3.130984 0.166051  
C 4.697302 1.367406 -0.305609  
C 5.112830 1.830043 -1.566558  
H 5.368796 1.120154 -2.348598  
C 5.219477 3.196204 -1.828800  
H 5.544978 3.534467 -2.809281  
C 4.913764 4.127710 -0.832306  
H 5.000665 5.191829 -1.036364  
C 4.502364 3.685112 0.425340  
H 4.266864 4.402749 1.207142  
C 4.394458 2.315916 0.683840  
H 4.063294 1.977731 1.662324  
P -1.157615 -0.267570 0.051478  
C -0.921906 -2.071301 0.323012  
C -0.918806 -2.616141 1.616597  
H -0.975383 -1.966239 2.483666  
C -0.848433 -3.997827 1.804951  
H -0.850230 -4.400357 2.813964  
C -0.788023 -4.854693 0.706275  
H -0.737443 -5.929965 0.853773  
C -0.810336 -4.323780 -0.585336  
H -0.780598 -4.983914 -1.447872  
C -0.883535 -2.944942 -0.776265  
H -0.925418 -2.555368 -1.788365  
C -0.420232 0.547657 1.534799  
C 0.806964 0.139635 2.087035  
H 1.352271 -0.696662 1.661786  
C 1.335965 0.791101 3.202274  
H 2.282379 0.455944 3.617976

C 0.646125 1.857001 3.784652  
H 1.052900 2.355788 4.660603  
C -0.572919 2.269497 3.244346  
H -1.123039 3.086880 3.704744  
C -1.106194 1.622318 2.126445  
H -2.050875 1.951909 1.702369  
Pd -3.257107 0.552821 -0.435557  
C -4.031577 -1.276418 -0.790601  
C -4.176454 -1.667638 -2.131732  
C -4.528560 -2.138964 0.207703  
C -4.788082 -2.877912 -2.467676  
H -3.827910 -1.014054 -2.928037  
C -5.140405 -3.359295 -0.137888  
C -5.269769 -3.732875 -1.468214  
H -4.895038 -3.153402 -3.515229  
H -5.510266 -3.988373 0.667373  
H -5.746831 -4.672998 -1.733208  
C -4.428543 -1.789226 1.641135  
O -4.799774 -2.495293 2.564747  
H -3.974248 -0.792972 1.838038  
O -4.950341 1.729907 -0.868093  
C -4.325087 2.847896 -0.660921  
O -4.827707 3.989073 -0.775760  
O -3.032499 2.701185 -0.302053  
K -2.697331 5.210025 -0.279604  
C -0.059122 0.230193 -1.384159  
H -0.394888 1.253828 -1.589924  
H -0.398062 -0.365368 -2.241391  
C 1.476596 0.211669 -1.277776  
H 1.862443 0.790849 -2.129349  
H 1.787229 0.762880 -0.382835  
C 2.130460 -1.176915 -1.300211  
H 1.750796 -1.734405 -2.168452  
H 1.827584 -1.754494 -0.419303  
C 3.666848 -1.151576 -1.384748  
H 4.034632 -2.181260 -1.461661  
H 3.994940 -0.635833 -2.295952

**TS2**

P -5.206366 0.247755 0.163907  
C -7.047584 0.438454 0.222455  
C -7.811582 -0.621258 0.748781

|    |            |           |           |   |           |           |           |
|----|------------|-----------|-----------|---|-----------|-----------|-----------|
| H  | -7.316837  | -1.549908 | 1.023075  | C | 4.757211  | 1.909642  | -0.422996 |
| C  | -9.844395  | 0.680524  | 0.568507  | C | 4.692009  | 2.246670  | -3.186048 |
| H  | -10.919596 | 0.773393  | 0.700350  | H | 3.037007  | 0.884263  | -3.168800 |
| C  | -9.102288  | 1.744311  | 0.056764  | C | 5.682514  | 2.762536  | -1.057651 |
| H  | -9.597809  | 2.673482  | -0.215898 | C | 5.655695  | 2.935034  | -2.434111 |
| C  | -7.720127  | 1.623876  | -0.116496 | H | 4.658622  | 2.369860  | -4.267626 |
| H  | -7.168868  | 2.466151  | -0.522924 | H | 6.409033  | 3.277898  | -0.434406 |
| C  | -4.983836  | -1.234489 | -0.920949 | H | 6.371043  | 3.591469  | -2.924470 |
| C  | -5.889674  | -1.633476 | -1.920111 | C | 4.823957  | 1.796013  | 1.051463  |
| H  | -6.825159  | -1.095891 | -2.051879 | O | 5.597660  | 2.416934  | 1.766379  |
| C  | -5.596687  | -2.721297 | -2.742986 | H | 4.088905  | 1.089208  | 1.490480  |
| H  | -6.308374  | -3.023526 | -3.508913 | C | 3.810392  | -1.628633 | -0.301737 |
| C  | -4.387156  | -3.410935 | -2.598152 | N | 4.608256  | -1.609643 | -1.751812 |
| H  | -4.157398  | -4.246025 | -3.256342 | N | 4.681242  | -1.789238 | -2.854994 |
| C  | -3.475957  | -3.020153 | -1.617328 | C | 3.514585  | -3.028470 | -0.033486 |
| H  | -2.511300  | -3.499517 | -1.482454 | C | 2.549612  | -3.751859 | -0.766540 |
| C  | -3.785351  | -1.950273 | -0.773245 | C | 4.269167  | -3.663007 | 1.064574  |
| H  | -3.052263  | -1.690329 | -0.015015 | C | 2.243688  | -5.072305 | -0.466247 |
| P  | 0.683742   | 1.577437  | 0.185693  | H | 1.998373  | -3.236056 | -1.550815 |
| C  | 0.863231   | 3.425226  | 0.112616  | C | 3.856511  | -5.030163 | 1.368841  |
| C  | 0.055357   | 4.287799  | 0.876270  | C | 2.913347  | -5.701352 | 0.616179  |
| H  | -0.639311  | 3.876329  | 1.601550  | H | 1.489024  | -5.606432 | -1.035966 |
| C  | 0.144782   | 5.672142  | 0.725830  | H | 4.389449  | -5.527108 | 2.177253  |
| H  | -0.487366  | 6.320244  | 1.328423  | H | 2.678328  | -6.739431 | 0.855194  |
| C  | 1.041410   | 6.222615  | -0.192914 | O | -0.039165 | -1.645684 | -1.586393 |
| H  | 1.113996   | 7.301655  | -0.306878 | C | -0.019158 | -1.905497 | -0.355026 |
| C  | 1.845088   | 5.378640  | -0.959091 | O | -0.811267 | -2.708820 | 0.265769  |
| H  | 2.552160   | 5.793764  | -1.672726 | O | 0.896453  | -1.303079 | 0.448705  |
| C  | 1.758049   | 3.992280  | -0.807759 | K | 1.064317  | -3.337231 | 1.938567  |
| H  | 2.393609   | 3.349686  | -1.406072 | O | 5.163808  | -3.073926 | 1.717289  |
| C  | 0.227037   | 1.279747  | 1.950548  | H | 4.619927  | -1.287609 | 0.347138  |
| C  | -0.670077  | 0.262519  | 2.320767  | C | -0.809901 | 1.321279  | -0.899645 |
| H  | -1.143286  | -0.357683 | 1.569938  | H | -0.796446 | 0.259296  | -1.178296 |
| C  | -0.920848  | -0.001623 | 3.669590  | H | -0.541728 | 1.866221  | -1.816276 |
| H  | -1.635866  | -0.778045 | 3.932997  | C | -2.195271 | 1.764492  | -0.411427 |
| C  | -0.264820  | 0.719181  | 4.670388  | H | -2.467397 | 1.206578  | 0.490586  |
| H  | -0.462727  | 0.508067  | 5.718828  | H | -2.195936 | 2.827024  | -0.131499 |
| C  | 0.650221   | 1.710584  | 4.312986  | C | -3.252878 | 1.521079  | -1.504852 |
| H  | 1.179708   | 2.271525  | 5.079125  | H | -3.089687 | 0.532276  | -1.948887 |
| C  | 0.892603   | 1.987277  | 2.965923  | H | -3.099542 | 2.246482  | -2.316701 |
| H  | 1.610486   | 2.760529  | 2.708391  | C | -4.714077 | 1.626241  | -1.029671 |
| Pd | 2.375705   | -0.050635 | -0.376314 | H | -5.385670 | 1.613704  | -1.898039 |
| C  | 3.775833   | 1.205068  | -1.160178 | H | -4.867462 | 2.580697  | -0.507298 |
| C  | 3.774070   | 1.403058  | -2.558067 | C | -9.190478 | -0.506516 | 0.912503  |

|             |           |           |           |    |           |           |           |
|-------------|-----------|-----------|-----------|----|-----------|-----------|-----------|
| H           | -9.756485 | -1.344632 | 1.312536  | H  | 0.158040  | -3.474225 | 5.692923  |
|             |           |           |           | C  | -0.402502 | -3.917548 | 3.655826  |
|             |           |           |           | H  | -0.646615 | -4.957666 | 3.858759  |
| <b>Int5</b> |           |           |           | C  | -0.548077 | -3.415186 | 2.362060  |
|             |           |           |           | H  | -0.903792 | -4.074400 | 1.574870  |
| P           | 5.398803  | 0.745956  | 0.460181  | Pd | -2.755242 | -0.306408 | 0.249380  |
| C           | 7.170488  | 0.202950  | 0.408863  | C  | -3.567508 | -1.210339 | -1.402805 |
| C           | 8.150359  | 1.122436  | 0.829589  | C  | -3.429537 | -0.626964 | -2.680820 |
| H           | 7.852664  | 2.131758  | 1.104931  | C  | -4.244590 | -2.453704 | -1.354330 |
| C           | 9.894804  | -0.532396 | 0.559795  | C  | -3.906805 | -1.247705 | -3.836377 |
| H           | 10.942601 | -0.816012 | 0.618530  | H  | -2.936708 | 0.337327  | -2.777735 |
| C           | 8.936131  | -1.459563 | 0.153552  | C  | -4.726892 | -3.080330 | -2.520451 |
| H           | 9.233465  | -2.472050 | -0.109375 | C  | -4.558676 | -2.486985 | -3.763227 |
| C           | 7.588200  | -1.095184 | 0.075688  | H  | -3.774777 | -0.761209 | -4.802216 |
| H           | 6.864340  | -1.835571 | -0.249282 | H  | -5.233332 | -4.036161 | -2.410432 |
| C           | 5.385487  | 2.081224  | -0.830308 | H  | -4.932510 | -2.968528 | -4.664289 |
| C           | 6.207504  | 2.081494  | -1.969717 | C  | -4.467133 | -3.142106 | -0.063404 |
| H           | 6.927026  | 1.280058  | -2.114685 | O  | -4.998292 | -4.237360 | 0.064210  |
| C           | 6.117120  | 3.104989  | -2.913479 | H  | -4.107606 | -2.578681 | 0.823431  |
| H           | 6.762110  | 3.090884  | -3.789057 | C  | -4.391843 | 0.829179  | 0.361627  |
| C           | 5.197489  | 4.142949  | -2.738648 | C  | -4.625240 | 2.086406  | -0.168804 |
| H           | 5.125573  | 4.938022  | -3.476718 | C  | -3.669051 | 2.713624  | -1.051387 |
| C           | 4.373631  | 4.154987  | -1.612706 | C  | -5.865964 | 2.840731  | 0.207631  |
| H           | 3.655056  | 4.957628  | -1.468326 | C  | -3.839133 | 3.984356  | -1.534875 |
| C           | 4.473176  | 3.135215  | -0.662762 | H  | -2.771208 | 2.147814  | -1.275383 |
| H           | 3.834837  | 3.156500  | 0.217050  | C  | -5.950970 | 4.215463  | -0.312946 |
| P           | -0.563459 | -1.399317 | 0.388529  | C  | -5.002779 | 4.735526  | -1.148975 |
| C           | 0.088657  | -2.736275 | -0.728017 | H  | -3.105765 | 4.430480  | -2.201866 |
| C           | 1.163511  | -3.575917 | -0.384675 | H  | -6.835556 | 4.782132  | -0.031292 |
| H           | 1.603852  | -3.509302 | 0.605262  | H  | -5.126162 | 5.746870  | -1.538430 |
| C           | 1.662550  | -4.509182 | -1.294851 | O  | -1.267657 | 2.413000  | 0.974444  |
| H           | 2.492577  | -5.151072 | -1.007622 | C  | -1.726198 | 1.847611  | 2.043766  |
| C           | 1.096788  | -4.622160 | -2.567288 | O  | -1.990398 | 2.509546  | 3.103492  |
| H           | 1.482845  | -5.352795 | -3.274459 | O  | -1.966849 | 0.539870  | 2.036408  |
| C           | 0.027762  | -3.797938 | -2.919934 | K  | -2.937238 | 4.259501  | 1.554617  |
| H           | -0.429706 | -3.883735 | -3.902410 | O  | -6.763420 | 2.378488  | 0.926350  |
| C           | -0.473665 | -2.865545 | -2.008179 | H  | -5.198832 | 0.477076  | 1.011252  |
| H           | -1.313936 | -2.239599 | -2.289946 | C  | 0.662984  | -0.022749 | 0.107646  |
| C           | -0.241931 | -2.074879 | 2.070907  | H  | 0.220818  | 0.851669  | 0.602859  |
| C           | 0.184774  | -1.241533 | 3.117029  | H  | 0.559546  | 0.190771  | -0.964963 |
| H           | 0.367248  | -0.190826 | 2.931290  | C  | 2.151211  | -0.242556 | 0.467111  |
| C           | 0.334725  | -1.747864 | 4.408950  | H  | 2.493503  | 0.599697  | 1.081729  |
| H           | 0.662859  | -1.085019 | 5.205556  | H  | 2.282987  | -1.131629 | 1.097161  |
| C           | 0.046176  | -3.085494 | 4.683328  | C  | 3.050730  | -0.367601 | -0.772789 |

|            |           |           |           |    |           |           |           |
|------------|-----------|-----------|-----------|----|-----------|-----------|-----------|
| H          | 2.960116  | 0.542084  | -1.381141 | C  | -0.495021 | 3.240888  | 0.579084  |
| H          | 2.679904  | -1.190614 | -1.397223 | H  | -1.484060 | 2.937528  | 0.906309  |
| C          | 4.536263  | -0.640896 | -0.473724 | C  | 0.208302  | 0.254103  | -2.167370 |
| H          | 5.072303  | -0.842543 | -1.410639 | C  | 0.473702  | -1.076356 | -2.537651 |
| H          | 4.618451  | -1.540316 | 0.151562  | H  | 0.422405  | -1.868134 | -1.797183 |
| C          | 9.495103  | 0.764631  | 0.896074  | C  | 0.765448  | -1.400065 | -3.864886 |
| H          | 10.232412 | 1.496449  | 1.217483  | H  | 0.965335  | -2.437432 | -4.122973 |
|            |           |           |           | C  | 0.786149  | -0.407671 | -4.849604 |
|            |           |           |           | H  | 1.017711  | -0.661698 | -5.882144 |
|            |           |           |           | C  | 0.510558  | 0.915353  | -4.494709 |
|            |           |           |           | H  | 0.522259  | 1.698709  | -5.249660 |
|            |           |           |           | C  | 0.222314  | 1.240990  | -3.167088 |
|            |           |           |           | H  | 0.006906  | 2.274244  | -2.909899 |
|            |           |           |           | Pd | -2.729932 | -0.001862 | -0.107207 |
|            |           |           |           | C  | -3.535559 | 1.226381  | 1.310745  |
|            |           |           |           | C  | -3.332981 | 0.934057  | 2.681063  |
|            |           |           |           | C  | -4.138574 | 2.481331  | 1.022990  |
|            |           |           |           | C  | -3.695174 | 1.822042  | 3.688877  |
|            |           |           |           | H  | -2.903980 | -0.026155 | 2.955495  |
|            |           |           |           | C  | -4.514435 | 3.373692  | 2.046489  |
|            |           |           |           | C  | -4.292328 | 3.054802  | 3.377095  |
|            |           |           |           | H  | -3.520315 | 1.553645  | 4.729573  |
|            |           |           |           | H  | -4.972529 | 4.315720  | 1.755687  |
|            |           |           |           | H  | -4.581652 | 3.742590  | 4.168446  |
|            |           |           |           | C  | -4.374596 | 2.897103  | -0.374992 |
|            |           |           |           | O  | -4.829179 | 3.979596  | -0.722334 |
|            |           |           |           | H  | -4.090768 | 2.132999  | -1.129866 |
|            |           |           |           | C  | -4.626793 | -0.358965 | 0.374947  |
|            |           |           |           | C  | -5.122754 | -1.454250 | 1.057643  |
|            |           |           |           | C  | -4.260615 | -2.475060 | 1.605868  |
|            |           |           |           | C  | -6.606038 | -1.588347 | 1.213230  |
|            |           |           |           | C  | -4.763280 | -3.541719 | 2.294318  |
|            |           |           |           | H  | -3.193187 | -2.400271 | 1.403366  |
|            |           |           |           | C  | -7.058684 | -2.751504 | 1.979792  |
|            |           |           |           | C  | -6.181919 | -3.663867 | 2.486757  |
|            |           |           |           | H  | -4.101099 | -4.313239 | 2.678113  |
|            |           |           |           | H  | -8.133038 | -2.849221 | 2.117218  |
|            |           |           |           | H  | -6.560892 | -4.519514 | 3.046967  |
|            |           |           |           | O  | -1.176691 | -2.805066 | -0.106775 |
|            |           |           |           | C  | -1.790901 | -2.713238 | -1.206826 |
|            |           |           |           | O  | -1.857487 | -3.639372 | -2.097289 |
|            |           |           |           | O  | -2.401214 | -1.547164 | -1.543795 |
|            |           |           |           | K  | -3.200046 | -2.326564 | -3.705773 |
|            |           |           |           | C  | 4.318915  | -1.796280 | 1.190831  |
| <b>TS3</b> |           |           |           |    |           |           |           |
| P          | 5.458579  | -0.384762 | 1.691540  |    |           |           |           |
| C          | 7.087332  | -1.284251 | 1.642769  |    |           |           |           |
| C          | 8.052949  | -1.146931 | 0.634477  |    |           |           |           |
| H          | 7.859964  | -0.496401 | -0.212773 |    |           |           |           |
| C          | 9.263911  | -1.841161 | 0.703193  |    |           |           |           |
| H          | 9.997201  | -1.720218 | -0.090920 |    |           |           |           |
| C          | 9.531941  | -2.689496 | 1.777960  |    |           |           |           |
| H          | 10.473463 | -3.230695 | 1.828393  |    |           |           |           |
| C          | 8.582387  | -2.832317 | 2.792918  |    |           |           |           |
| H          | 8.781877  | -3.484539 | 3.639814  |    |           |           |           |
| C          | 7.380415  | -2.128333 | 2.729433  |    |           |           |           |
| H          | 6.659610  | -2.231362 | 3.538328  |    |           |           |           |
| C          | 5.571840  | 0.708109  | 0.197625  |    |           |           |           |
| C          | 5.363734  | 0.293851  | -1.128369 |    |           |           |           |
| H          | 5.118578  | -0.741336 | -1.344792 |    |           |           |           |
| C          | 5.458848  | 1.200286  | -2.186350 |    |           |           |           |
| H          | 5.280722  | 0.860939  | -3.203488 |    |           |           |           |
| C          | 5.776411  | 2.538104  | -1.939010 |    |           |           |           |
| H          | 5.848473  | 3.243093  | -2.763305 |    |           |           |           |
| C          | 5.992017  | 2.965221  | -0.627356 |    |           |           |           |
| H          | 6.235234  | 4.005242  | -0.424204 |    |           |           |           |
| C          | 5.881513  | 2.058743  | 0.428988  |    |           |           |           |
| H          | 6.026608  | 2.402594  | 1.450285  |    |           |           |           |
| P          | -0.366772 | 0.636338  | -0.452510 |    |           |           |           |
| C          | 0.296132  | 2.342337  | -0.153475 |    |           |           |           |
| C          | 1.569542  | 2.764415  | -0.577738 |    |           |           |           |
| H          | 2.197699  | 2.095849  | -1.158320 |    |           |           |           |
| C          | 2.036749  | 4.043315  | -0.272527 |    |           |           |           |
| H          | 3.027068  | 4.344505  | -0.605275 |    |           |           |           |
| C          | 1.239667  | 4.925494  | 0.461872  |    |           |           |           |
| H          | 1.603793  | 5.922812  | 0.698411  |    |           |           |           |
| C          | -0.026336 | 4.521283  | 0.885877  |    |           |           |           |
| H          | -0.659297 | 5.200953  | 1.450767  |    |           |           |           |



|             |            |           |           |    |           |           |           |
|-------------|------------|-----------|-----------|----|-----------|-----------|-----------|
| H           | 4.637334   | -2.631155 | 1.828397  | C  | -2.009964 | 2.224868  | -3.010492 |
| H           | 4.506076   | -2.118087 | 0.158309  | H  | -2.764260 | 2.992159  | -3.168883 |
| C           | 2.818400   | -1.536885 | 1.417635  | C  | -1.545924 | 1.463661  | -4.084294 |
| H           | 2.288558   | -2.488912 | 1.279725  | H  | -1.933639 | 1.639718  | -5.085333 |
| H           | 2.655168   | -1.242918 | 2.463855  | C  | -0.582206 | 0.474521  | -3.866554 |
| C           | 2.184235   | -0.490387 | 0.487067  | H  | -0.217547 | -0.124374 | -4.697671 |
| H           | 2.427090   | -0.744775 | -0.553004 | C  | -0.074287 | 0.248861  | -2.586772 |
| H           | 2.625555   | 0.496126  | 0.677641  | H  | 0.665173  | -0.530645 | -2.405984 |
| C           | 0.662423   | -0.442673 | 0.665887  | C  | -0.470014 | 1.879435  | 1.309843  |
| H           | 0.195575   | -1.432004 | 0.540140  | C  | -1.143931 | 1.535209  | 2.494605  |
| H           | 0.405718   | -0.106058 | 1.679958  | H  | -1.357445 | 0.496100  | 2.719591  |
| O           | -7.421183  | -0.780284 | 0.733668  | C  | -1.545055 | 2.517145  | 3.403116  |
| H           | -5.417571  | 0.278756  | -0.024328 | H  | -2.067062 | 2.223743  | 4.310918  |
|             |            |           |           | C  | -1.278765 | 3.862950  | 3.147920  |
|             |            |           |           | H  | -1.588817 | 4.627399  | 3.856586  |
|             |            |           |           | C  | -0.592423 | 4.217510  | 1.984434  |
| <b>Int6</b> |            |           |           | H  | -0.350506 | 5.258201  | 1.785522  |
| P           | -5.381079  | -0.326175 | -0.491967 | C  | -0.186269 | 3.237825  | 1.078773  |
| C           | -7.033075  | -1.003379 | -1.012116 | H  | 0.387063  | 3.533857  | 0.207689  |
| C           | -8.193378  | -0.915363 | -0.226055 | Pd | 2.568369  | 0.341635  | 0.011701  |
| H           | -8.133686  | -0.514359 | 0.780735  | C  | 4.446254  | 1.123879  | -1.094707 |
| C           | -9.429552  | -1.344690 | -0.715949 | C  | 4.800765  | 0.748982  | -2.438569 |
| H           | -10.311125 | -1.269710 | -0.083275 | C  | 3.468685  | 2.207636  | -0.943296 |
| C           | -9.535985  | -1.870455 | -2.003583 | C  | 4.198401  | 1.317245  | -3.527905 |
| H           | -10.497407 | -2.207778 | -2.382598 | H  | 5.593251  | 0.022491  | -2.572093 |
| C           | -8.394116  | -1.950467 | -2.804599 | C  | 2.851189  | 2.746770  | -2.125006 |
| H           | -8.462031  | -2.348628 | -3.814235 | C  | 3.180112  | 2.304577  | -3.375374 |
| C           | -7.163087  | -1.512981 | -2.317735 | H  | 4.511878  | 1.023686  | -4.527382 |
| H           | -6.292927  | -1.562974 | -2.968336 | H  | 2.145402  | 3.558709  | -1.982224 |
| C           | -5.571697  | -0.187137 | 1.349529  | H  | 2.702192  | 2.729940  | -4.253822 |
| C           | -5.901292  | -1.263230 | 2.191926  | C  | 3.408155  | 3.057367  | 0.267987  |
| H           | -6.092513  | -2.244547 | 1.765799  | O  | 2.698005  | 4.053277  | 0.377142  |
| C           | -5.995157  | -1.088968 | 3.572701  | H  | 4.086888  | 2.779146  | 1.094169  |
| H           | -6.248289  | -1.934026 | 4.208481  | C  | 5.733799  | -0.750429 | 0.167251  |
| C           | -5.758112  | 0.167189  | 4.138743  | C  | 5.771525  | -1.803971 | -0.770468 |
| H           | -5.824441  | 0.300800  | 5.215667  | C  | 6.509304  | -0.856633 | 1.421338  |
| C           | -5.431921  | 1.245845  | 3.316697  | C  | 6.577004  | -2.929181 | -0.598947 |
| H           | -5.238163  | 2.224455  | 3.747880  | H  | 5.095727  | -1.775887 | -1.620675 |
| C           | -5.342093  | 1.067824  | 1.933343  | C  | 7.354814  | -2.032550 | 1.527145  |
| H           | -5.075579  | 1.908666  | 1.298371  | C  | 7.388105  | -3.017741 | 0.554129  |
| P           | 0.179825   | 0.602225  | 0.147312  | H  | 6.564666  | -3.729176 | -1.333892 |
| C           | -0.544817  | 1.011206  | -1.499958 | H  | 7.964198  | -2.109200 | 2.425864  |
| C           | -1.515078  | 1.998299  | -1.723117 | H  | 8.036434  | -3.884425 | 0.688436  |
| H           | -1.891027  | 2.590614  | -0.894908 | O  | 1.574691  | -2.172738 | -1.198093 |

|   |           |           |           |   |           |           |           |
|---|-----------|-----------|-----------|---|-----------|-----------|-----------|
| C | 2.113957  | -2.538196 | -0.113636 | C | 4.963296  | 3.695299  | 0.801907  |
| O | 2.397699  | -3.729351 | 0.232883  | H | 4.687805  | 4.273745  | 1.679744  |
| O | 2.437482  | -1.586225 | 0.816836  | C | 4.919341  | 2.299213  | 0.850608  |
| K | 4.331865  | -3.007988 | 1.750348  | H | 4.598778  | 1.803160  | 1.762774  |
| C | -0.676340 | -0.975616 | 0.628466  | C | -0.328368 | -1.926674 | 0.618872  |
| H | -0.274833 | -1.229384 | 1.615284  | C | -0.343870 | -2.602080 | 1.852539  |
| H | -0.231480 | -1.705222 | -0.058637 | H | -0.470511 | -2.043162 | 2.772414  |
| C | -2.220701 | -1.039260 | 0.604079  | C | -0.264317 | -3.996448 | 1.899741  |
| H | -2.664508 | -0.057901 | 0.812133  | H | -0.295508 | -4.495972 | 2.864074  |
| H | -2.549393 | -1.690821 | 1.427354  | C | -0.177254 | -4.740641 | 0.720426  |
| C | -2.795019 | -1.594631 | -0.708819 | H | -0.105235 | -5.825855 | 0.759883  |
| H | -2.286277 | -2.540113 | -0.941025 | C | -0.199929 | -4.077682 | -0.513266 |
| H | -2.562975 | -0.912788 | -1.533823 | H | -0.154180 | -4.645208 | -1.440662 |
| C | -4.309498 | -1.868957 | -0.679548 | C | -0.287254 | -2.682688 | -0.569643 |
| H | -4.555887 | -2.599074 | 0.102545  | H | -0.398339 | -2.192269 | -1.534958 |
| H | -4.606326 | -2.322358 | -1.632888 | C | 0.431217  | 0.509544  | 2.023484  |
| C | 4.901239  | 0.431909  | 0.068368  | C | 1.661726  | -0.062659 | 2.387355  |
| H | 4.907285  | 0.974477  | 1.012470  | H | 2.044169  | -0.924033 | 1.848563  |
| O | 6.417757  | -0.011995 | 2.353708  | C | 2.399286  | 0.450026  | 3.456572  |

#### TS4

|    |           |           |           |   |           |           |           |
|----|-----------|-----------|-----------|---|-----------|-----------|-----------|
| Pd | -2.888546 | 0.646019  | 0.778414  | H | 3.343897  | -0.015377 | 3.728659  |
| P  | -0.554696 | -0.090312 | 0.581075  | C | 1.918344  | 1.547723  | 4.174593  |
| P  | 5.115418  | -0.315688 | -0.126640 | H | 2.488804  | 1.944836  | 5.011519  |
| C  | 6.783876  | -0.891477 | -0.710982 | C | 0.696309  | 2.121687  | 3.821235  |
| C  | 7.931449  | -0.082038 | -0.677683 | H | 0.305344  | 2.966635  | 4.382280  |
| H  | 7.846495  | 0.961674  | -0.392504 | C | -0.048552 | 1.604986  | 2.758475  |
| C  | 9.186205  | -0.596030 | -1.013885 | H | -1.008897 | 2.047434  | 2.513845  |
| H  | 10.056585 | 0.055556  | -0.984491 | C | -3.876181 | 2.230162  | -1.535404 |
| C  | 9.325751  | -1.932526 | -1.388552 | C | -4.513242 | 2.604321  | -2.727191 |
| H  | 10.301883 | -2.330978 | -1.653350 | C | -3.695614 | 3.207485  | -0.542687 |
| C  | 8.197411  | -2.755762 | -1.411082 | C | -4.935056 | 3.921944  | -2.919814 |
| H  | 8.290464  | -3.802302 | -1.691486 | H | -4.664265 | 1.858154  | -3.502423 |
| C  | 6.946913  | -2.243332 | -1.067412 | C | -4.084777 | 4.535231  | -0.746384 |
| H  | 6.088683  | -2.911303 | -1.070048 | C | -4.712813 | 4.894787  | -1.937758 |
| C  | 5.252479  | 1.528759  | -0.273803 | H | -5.436380 | 4.194067  | -3.846664 |
| C  | 5.635548  | 2.194849  | -1.451194 | H | -3.916484 | 5.255978  | 0.049234  |
| H  | 5.904668  | 1.621227  | -2.334513 | H | -5.043853 | 5.918603  | -2.097331 |
| C  | 5.685130  | 3.587844  | -1.500677 | C | -3.131554 | 2.736249  | 0.762812  |
| H  | 5.981052  | 4.086217  | -2.420726 | O | -2.733423 | 3.494539  | 1.630607  |
| C  | 5.347103  | 4.341690  | -0.372887 | H | -4.157005 | 1.614664  | 1.161330  |
| H  | 5.377204  | 5.427619  | -0.414226 | C | -3.842564 | -0.351495 | -1.836845 |
|    |           |           |           | C | -5.197260 | -0.668430 | -1.655079 |
|    |           |           |           | C | -2.950285 | -1.304929 | -2.501887 |
|    |           |           |           | C | -5.746505 | -1.881260 | -2.075947 |
|    |           |           |           | H | -5.828577 | 0.052576  | -1.139061 |

|   |           |           |           |    |           |           |           |
|---|-----------|-----------|-----------|----|-----------|-----------|-----------|
| C | -3.555387 | -2.552638 | -2.900273 | C  | -5.875709 | 3.683632  | 0.825479  |
| C | -4.907243 | -2.821309 | -2.702258 | H  | -6.203295 | 4.395971  | 1.578912  |
| H | -6.801449 | -2.093629 | -1.920908 | C  | -5.371851 | 4.138667  | -0.396880 |
| H | -2.915361 | -3.263701 | -3.421333 | H  | -5.303580 | 5.205503  | -0.594226 |
| H | -5.323840 | -3.766641 | -3.055037 | C  | -4.946480 | 3.220124  | -1.355980 |
| O | -2.622847 | -0.424385 | 2.805578  | H  | -4.533371 | 3.561787  | -2.300597 |
| C | -3.261226 | -1.481807 | 2.367924  | C  | -5.028823 | 1.849600  | -1.095641 |
| O | -3.275664 | -2.599189 | 2.951345  | H  | -4.681158 | 1.141502  | -1.843153 |
| O | -3.838425 | -1.328323 | 1.190369  | P  | -0.002562 | -0.575204 | -0.479182 |
| K | -3.433112 | -3.525666 | 0.232715  | C  | -0.792399 | -2.224999 | -0.793666 |
| C | 0.372988  | 0.570967  | -0.904654 | C  | -2.122944 | -2.401403 | -1.214795 |
| H | 0.049178  | 1.620176  | -0.920345 | H  | -2.747912 | -1.538720 | -1.424190 |
| H | -0.105341 | 0.097830  | -1.771650 | C  | -2.662506 | -3.679541 | -1.369046 |
| C | 1.909187  | 0.543524  | -0.993322 | H  | -3.695169 | -3.790070 | -1.691659 |
| H | 2.340357  | 0.946217  | -0.069486 | C  | -1.882129 | -4.807814 | -1.103726 |
| H | 2.196280  | 1.248995  | -1.787776 | H  | -2.302271 | -5.803798 | -1.224970 |
| C | 2.537124  | -0.818551 | -1.317347 | C  | -0.559753 | -4.648103 | -0.688945 |
| H | 2.033859  | -1.239531 | -2.198531 | H  | 0.059915  | -5.519142 | -0.489764 |
| H | 2.355387  | -1.525534 | -0.499749 | C  | -0.018420 | -3.368733 | -0.540685 |
| C | 4.047171  | -0.766829 | -1.616262 | H  | 1.017093  | -3.252495 | -0.241446 |
| H | 4.253141  | -0.084622 | -2.451044 | C  | -0.728641 | 0.532929  | -1.760186 |
| H | 4.379861  | -1.761633 | -1.935231 | C  | -0.797534 | 1.917135  | -1.518787 |
| C | -3.237632 | 0.887932  | -1.331152 | H  | -0.464233 | 2.323505  | -0.569995 |
| H | -2.214309 | 0.941475  | -1.709505 | C  | -1.238954 | 2.791032  | -2.512877 |
| O | -1.716982 | -1.057133 | -2.718363 | H  | -1.268141 | 3.857147  | -2.303630 |
|   |           |           |           | C  | -1.614953 | 2.306683  | -3.767525 |
|   |           |           |           | H  | -1.953630 | 2.990852  | -4.542651 |
|   |           |           |           | C  | -1.526512 | 0.937104  | -4.027409 |
|   |           |           |           | H  | -1.797557 | 0.546959  | -5.006070 |
|   |           |           |           | C  | -1.080442 | 0.060367  | -3.037319 |
|   |           |           |           | H  | -1.003787 | -0.998611 | -3.262932 |
|   |           |           |           | Pd | 2.623345  | -0.302226 | -0.090697 |
|   |           |           |           | C  | 5.337588  | -1.457539 | 0.135430  |
|   |           |           |           | C  | 6.589817  | -1.870077 | 0.616312  |
|   |           |           |           | C  | 4.681341  | -2.282767 | -0.789411 |
|   |           |           |           | C  | 7.160985  | -3.060428 | 0.162852  |
|   |           |           |           | H  | 7.107455  | -1.247282 | 1.339520  |
|   |           |           |           | C  | 5.262710  | -3.461621 | -1.270298 |
|   |           |           |           | C  | 6.507272  | -3.858057 | -0.786194 |
|   |           |           |           | H  | 8.129852  | -3.369696 | 0.550598  |
|   |           |           |           | H  | 4.713413  | -4.059835 | -1.992326 |
|   |           |           |           | H  | 6.961105  | -4.785967 | -1.127234 |
|   |           |           |           | C  | 3.314390  | -1.843625 | -1.185680 |
|   |           |           |           | O  | 2.662903  | -2.375562 | -2.061091 |

**Int7**

|   |            |           |          |
|---|------------|-----------|----------|
| P | -5.531729  | -0.455510 | 0.406707 |
| C | -7.274499  | -0.776026 | 0.967129 |
| C | -8.350643  | 0.062451  | 0.631457 |
| H | -8.163553  | 0.995663  | 0.109747 |
| C | -9.662859  | -0.279893 | 0.966448 |
| H | -10.475733 | 0.391473  | 0.699148 |
| C | -9.932759  | -1.470227 | 1.642234 |
| H | -10.953792 | -1.734292 | 1.905876 |
| C | -8.876189  | -2.323565 | 1.968812 |
| H | -9.070485  | -3.259757 | 2.486896 |
| C | -7.567537  | -1.984175 | 1.626784 |
| H | -6.765847  | -2.676972 | 1.871329 |
| C | -5.526257  | 1.377088  | 0.127880 |
| C | -5.947946  | 2.315631  | 1.086160 |
| H | -6.341308  | 1.974039  | 2.040281 |

|            |           |           |           |    |           |           |           |
|------------|-----------|-----------|-----------|----|-----------|-----------|-----------|
| H          | 2.513650  | -1.445346 | 0.988652  | H  | 8.930445  | 3.417057  | 2.536904  |
| C          | 5.018378  | 0.509743  | 1.745570  | C  | 7.471049  | 2.098167  | 1.667085  |
| C          | 4.838345  | -0.159745 | 2.970148  | H  | 6.648667  | 2.770187  | 1.900566  |
| C          | 5.571102  | 1.856291  | 1.728340  | C  | 5.536594  | -1.324920 | 0.167824  |
| C          | 5.175747  | 0.416746  | 4.188380  | C  | 5.977030  | -2.244838 | 1.135750  |
| H          | 4.404089  | -1.158802 | 2.947678  | H  | 6.352367  | -1.886123 | 2.090873  |
| C          | 5.906636  | 2.411453  | 3.009092  | C  | 5.947103  | -3.615888 | 0.883172  |
| C          | 5.712784  | 1.718585  | 4.190925  | H  | 6.288600  | -4.313759 | 1.643915  |
| H          | 5.013725  | -0.119833 | 5.120364  | C  | 5.468135  | -4.092839 | -0.340863 |
| H          | 6.324134  | 3.416925  | 3.012651  | H  | 5.433195  | -5.162353 | -0.532243 |
| H          | 5.977784  | 2.189710  | 5.138085  | C  | 5.024694  | -3.192980 | -1.309436 |
| O          | 1.725270  | 1.655333  | 0.677680  | H  | 4.630802  | -3.552353 | -2.255653 |
| C          | 2.172127  | 2.286233  | -0.366580 | C  | 5.063962  | -1.819033 | -1.056966 |
| O          | 2.088466  | 3.529948  | -0.542851 | H  | 4.702140  | -1.125987 | -1.811854 |
| O          | 2.786171  | 1.517466  | -1.272388 | P  | -0.023706 | 0.462205  | -0.495541 |
| K          | 4.561400  | 3.466113  | -1.265063 | C  | 0.689399  | 2.144577  | -0.803370 |
| C          | -0.773241 | 0.000565  | 1.127394  | C  | 2.011707  | 2.373781  | -1.223588 |
| H          | -0.195399 | 0.904713  | 1.343965  | H  | 2.668550  | 1.536384  | -1.437496 |
| H          | -0.450398 | -0.738222 | 1.872860  | C  | 2.501230  | 3.673028  | -1.368177 |
| C          | -2.292699 | 0.256609  | 1.227237  | H  | 3.528413  | 3.826048  | -1.690625 |
| H          | -2.700470 | 0.498693  | 0.238866  | C  | 1.678255  | 4.768174  | -1.093475 |
| H          | -2.454358 | 1.158423  | 1.835181  | H  | 2.059504  | 5.780366  | -1.207949 |
| C          | -3.087169 | -0.896074 | 1.859423  | C  | 0.364049  | 4.555203  | -0.676175 |
| H          | -2.663903 | -1.108251 | 2.852279  | H  | -0.287349 | 5.400215  | -0.466902 |
| H          | -2.956175 | -1.809010 | 1.267864  | C  | -0.126745 | 3.254870  | -0.537916 |
| C          | -4.591169 | -0.618037 | 2.037474  | H  | -1.153998 | 3.093945  | -0.227519 |
| H          | -4.749552 | 0.277180  | 2.652821  | C  | 0.752208  | -0.624273 | -1.762394 |
| H          | -5.049151 | -1.456054 | 2.576162  | C  | 0.852779  | -2.004559 | -1.509348 |
| C          | 4.724152  | -0.126041 | 0.456358  | H  | 0.517111  | -2.410775 | -0.560954 |
| H          | 4.971607  | 0.577293  | -0.342814 | C  | 1.331951  | -2.872418 | -2.490640 |
| O          | 5.783459  | 2.506652  | 0.639794  | H  | 1.388446  | -3.936087 | -2.274608 |
|            |           |           |           | C  | 1.711329  | -2.385424 | -3.743547 |
|            |           |           |           | H  | 2.077995  | -3.065408 | -4.509439 |
| <b>TS5</b> |           |           |           | C  | 1.589008  | -1.020998 | -4.014834 |
|            |           |           |           | H  | 1.860031  | -0.631006 | -4.993430 |
| P          | 5.489200  | 0.508797  | 0.435346  | C  | 1.106392  | -0.149439 | -3.037116 |
| C          | 7.217330  | 0.879786  | 1.009955  | H  | 0.998077  | 0.904531  | -3.272166 |
| C          | 8.318947  | 0.069415  | 0.688261  | Pd | -2.492662 | 0.108841  | -0.256073 |
| H          | 8.162335  | -0.870367 | 0.168414  | C  | -5.170168 | 1.569201  | 0.014029  |
| C          | 9.618007  | 0.448220  | 1.035045  | C  | -6.372915 | 2.157221  | 0.434790  |
| H          | 10.451313 | -0.202021 | 0.778747  | C  | -4.477638 | 2.162299  | -1.056158 |
| C          | 9.848862  | 1.647951  | 1.708652  | C  | -6.870814 | 3.287704  | -0.213742 |
| H          | 10.859666 | 1.940331  | 1.981621  | H  | -6.912295 | 1.712213  | 1.265028  |
| C          | 8.766569  | 2.473957  | 2.020858  | C  | -4.991633 | 3.281760  | -1.723719 |

|             |           |           |           |    |           |           |           |
|-------------|-----------|-----------|-----------|----|-----------|-----------|-----------|
| C           | -6.188321 | 3.852898  | -1.299178 | H  | 7.516547  | -1.618675 | -0.498426 |
| H           | -7.804298 | 3.731306  | 0.127344  | C  | 9.209471  | -0.743315 | 0.490506  |
| H           | -4.423696 | 3.695098  | -2.552643 | H  | 9.895985  | -1.502724 | 0.123176  |
| H           | -6.583556 | 4.736237  | -1.795869 | C  | 9.676676  | 0.282996  | 1.311725  |
| C           | -3.156822 | 1.574812  | -1.443029 | H  | 10.726630 | 0.330899  | 1.589315  |
| O           | -2.538560 | 1.944417  | -2.423030 | C  | 8.781359  | 1.253908  | 1.767231  |
| H           | -3.061986 | 0.976510  | 0.952025  | H  | 9.131751  | 2.065477  | 2.400612  |
| C           | -5.081889 | -0.195457 | 1.899248  | C  | 7.435818  | 1.192510  | 1.406566  |
| C           | -4.957011 | 0.564859  | 3.072373  | H  | 6.762829  | 1.972881  | 1.754648  |
| C           | -5.715085 | -1.502253 | 1.940191  | C  | 4.871771  | -1.512641 | -0.560941 |
| C           | -5.440101 | 0.121368  | 4.299852  | C  | 5.078032  | -2.669814 | 0.210179  |
| H           | -4.455547 | 1.531514  | 3.010286  | H  | 5.470848  | -2.585174 | 1.220156  |
| C           | -6.196581 | -1.922077 | 3.224536  | C  | 4.788722  | -3.932677 | -0.305772 |
| C           | -6.062490 | -1.138701 | 4.358795  | H  | 4.947550  | -4.816480 | 0.307166  |
| H           | -5.323213 | 0.728043  | 5.194748  | C  | 4.282408  | -4.061800 | -1.602409 |
| H           | -6.678016 | -2.897358 | 3.273928  | H  | 4.043659  | -5.045686 | -1.997880 |
| H           | -6.441077 | -1.507983 | 5.312463  | C  | 4.073249  | -2.923634 | -2.380468 |
| O           | -1.709521 | -1.769788 | 0.654156  | H  | 3.663895  | -3.011381 | -3.382928 |
| C           | -2.161069 | -2.537581 | -0.310239 | C  | 4.369860  | -1.660232 | -1.862688 |
| O           | -2.141615 | -3.796215 | -0.248770 | H  | 4.190156  | -0.776166 | -2.468911 |
| O           | -2.705384 | -1.905424 | -1.335722 | P  | -0.392060 | 1.038092  | -0.377094 |
| K           | -4.677232 | -3.578506 | -0.805749 | C  | 0.561995  | 2.619848  | -0.449394 |
| C           | 0.738998  | -0.078227 | 1.124589  | C  | 1.800852  | 2.754051  | -1.097663 |
| H           | 0.182622  | -0.996407 | 1.341149  | H  | 2.229283  | 1.912511  | -1.632771 |
| H           | 0.389074  | 0.658029  | 1.860122  | C  | 2.492932  | 3.966201  | -1.064406 |
| C           | 2.263900  | -0.291942 | 1.239997  | H  | 3.450666  | 4.051112  | -1.571912 |
| H           | 2.686633  | -0.535302 | 0.258303  | C  | 1.959650  | 5.060004  | -0.378584 |
| H           | 2.443666  | -1.181553 | 1.860566  | H  | 2.498436  | 6.004452  | -0.355227 |
| C           | 3.021146  | 0.889714  | 1.864570  | C  | 0.731533  | 4.935874  | 0.273457  |
| H           | 2.583799  | 1.101583  | 2.851336  | H  | 0.307269  | 5.782098  | 0.807885  |
| H           | 2.870353  | 1.792057  | 1.261382  | C  | 0.034137  | 3.726696  | 0.235959  |
| C           | 4.530646  | 0.655220  | 2.057275  | H  | -0.923876 | 3.630621  | 0.741097  |
| H           | 4.708687  | -0.230976 | 2.680206  | C  | 0.015961  | 0.147285  | -1.934730 |
| H           | 4.959991  | 1.509454  | 2.593944  | C  | 0.074705  | -1.258669 | -1.946003 |
| C           | -4.638252 | 0.289780  | 0.579457  | H  | -0.104745 | -1.834229 | -1.039484 |
| H           | -4.827579 | -0.516237 | -0.136961 | C  | 0.298032  | -1.937394 | -3.146796 |
| O           | -5.860530 | -2.232976 | 0.890817  | H  | 0.337001  | -3.023830 | -3.139491 |
|             |           |           |           | C  | 0.454274  | -1.235955 | -4.343527 |
|             |           |           |           | H  | 0.623605  | -1.771142 | -5.275318 |
| <b>Int8</b> |           |           |           | C  | 0.367634  | 0.157965  | -4.341363 |
|             |           |           |           | H  | 0.462884  | 0.714335  | -5.270722 |
| P           | 5.167396  | 0.211383  | 0.051478  | C  | 0.143636  | 0.844926  | -3.148106 |
| C           | 6.943166  | 0.150703  | 0.598594  | H  | 0.056664  | 1.926342  | -3.163662 |
| C           | 7.859337  | -0.808539 | 0.137205  | Pd | -2.604734 | 1.442874  | 0.206885  |

|   |           |           |           |     |            |           |           |
|---|-----------|-----------|-----------|-----|------------|-----------|-----------|
| C | -4.455274 | -1.138248 | -1.345117 |     |            |           |           |
| C | -5.564440 | -1.945108 | -1.654163 | TS6 |            |           |           |
| C | -4.465271 | 0.198251  | -1.805554 |     |            |           |           |
| C | -6.671056 | -1.452069 | -2.341318 | P   | -5.608827  | -0.072864 | -0.405973 |
| H | -5.546104 | -2.987532 | -1.344703 | C   | -5.296857  | 1.663021  | 0.169992  |
| C | -5.575968 | 0.680730  | -2.521233 | C   | -4.548712  | 1.830541  | 1.346359  |
| C | -6.682140 | -0.123575 | -2.772396 | H   | -4.207485  | 0.958642  | 1.899130  |
| H | -7.516804 | -2.104956 | -2.546899 | C   | -4.224572  | 3.107860  | 1.811801  |
| H | -5.545470 | 1.705365  | -2.878460 | H   | -3.631516  | 3.214590  | 2.715993  |
| H | -7.538276 | 0.275887  | -3.311545 | C   | -4.657283  | 4.235804  | 1.114172  |
| C | -3.334588 | 1.206363  | -1.631422 | H   | -4.406335  | 5.230113  | 1.475171  |
| O | -3.050038 | 1.938445  | -2.564149 | C   | -5.411091  | 4.083421  | -0.053387 |
| H | -2.449780 | -1.046047 | -0.595523 | H   | -5.749036  | 4.959813  | -0.601724 |
| C | -3.441733 | -2.378606 | 0.729865  | C   | -5.724466  | 2.808103  | -0.523464 |
| C | -4.652559 | -2.475154 | 1.410215  | H   | -6.309871  | 2.700319  | -1.432802 |
| C | -2.216005 | -2.908007 | 1.320941  | C   | -7.303050  | 0.073904  | -1.143627 |
| C | -4.761599 | -3.100079 | 2.670399  | C   | -8.351994  | 0.564697  | -0.342803 |
| H | -5.545760 | -2.049658 | 0.958573  | H   | -8.134348  | 0.931697  | 0.657299  |
| C | -2.368634 | -3.535007 | 2.609914  | C   | -9.663415  | 0.600083  | -0.812607 |
| C | -3.606344 | -3.648286 | 3.246293  | H   | -10.452534 | 0.993330  | -0.175888 |
| H | -5.728174 | -3.180899 | 3.161438  | C   | -9.965603  | 0.130077  | -2.094044 |
| H | -1.472462 | -3.965268 | 3.054428  | H   | -10.988917 | 0.153396  | -2.460319 |
| H | -3.671263 | -4.165120 | 4.204952  | C   | -8.941077  | -0.371817 | -2.895875 |
| O | -4.387509 | 1.940417  | 1.239342  | H   | -9.161559  | -0.741474 | -3.894702 |
| C | -3.806021 | 1.866997  | 2.416995  | C   | -7.624466  | -0.398763 | -2.426654 |
| O | -4.425482 | 1.784708  | 3.498106  | H   | -6.846361  | -0.791875 | -3.073769 |
| O | -2.476289 | 1.742154  | 2.364446  | P   | 0.176214   | -1.350017 | 0.742581  |
| K | -3.129942 | -0.592176 | 3.423077  | C   | -0.735354  | -0.991987 | 2.326149  |
| C | 0.392043  | 0.034948  | 0.982601  | C   | -2.000046  | -1.515400 | 2.651553  |
| H | -0.199585 | -0.892199 | 1.008901  | H   | -2.475333  | -2.236271 | 1.992515  |
| H | 0.154682  | 0.589330  | 1.900087  | C   | -2.652530  | -1.135985 | 3.827345  |
| C | 1.893751  | -0.316740 | 0.911686  | H   | -3.627622  | -1.557304 | 4.063704  |
| H | 2.211719  | -0.407142 | -0.133668 | C   | -2.049401  | -0.222547 | 4.696979  |
| H | 2.019111  | -1.321688 | 1.338092  | H   | -2.555718  | 0.072850  | 5.613995  |
| C | 2.816740  | 0.653636  | 1.663635  | C   | -0.790902  | 0.296439  | 4.388141  |
| H | 2.454012  | 0.750890  | 2.697688  | H   | -0.305977  | 0.997988  | 5.062606  |
| H | 2.754681  | 1.654093  | 1.221257  | C   | -0.129688  | -0.084929 | 3.215792  |
| C | 4.291616  | 0.213499  | 1.724297  | H   | 0.861623   | 0.321137  | 2.997447  |
| H | 4.380289  | -0.771687 | 2.200049  | C   | -0.198749  | -3.131168 | 0.389964  |
| H | 4.849044  | 0.917732  | 2.353503  | C   | -0.145537  | -3.591699 | -0.939898 |
| C | -3.263391 | -1.771014 | -0.653888 | H   | 0.070547   | -2.891979 | -1.741295 |
| H | -2.864875 | -2.564914 | -1.305973 | C   | -0.313766  | -4.944835 | -1.235324 |
| O | -1.083363 | -2.801897 | 0.739454  | H   | -0.269268  | -5.275548 | -2.270983 |
|   |           |           |           | C   | -0.527782  | -5.873281 | -0.213249 |

|    |           |           |           |    |           |           |           |
|----|-----------|-----------|-----------|----|-----------|-----------|-----------|
| H  | -0.658874 | -6.927772 | -0.445878 | H  | -4.639550 | -1.149036 | -2.364208 |
| C  | -0.558241 | -5.433390 | 1.111315  | H  | -4.920439 | 0.565766  | -2.700430 |
| H  | -0.711250 | -6.145434 | 1.919819  | C  | 4.470723  | 1.308115  | -3.303435 |
| C  | -0.393104 | -4.079133 | 1.409246  | H  | 5.256807  | 1.704030  | -3.956346 |
| H  | -0.414535 | -3.756864 | 2.446170  | O  | 2.207003  | 0.952487  | -1.744544 |
| Pd | 2.297463  | -0.645919 | 0.869380  |    |           |           |           |
| C  | 4.944717  | 0.029298  | -2.629420 |    |           |           |           |
| C  | 6.289844  | -0.361864 | -2.728703 | P  |           |           |           |
| C  | 4.070384  | -0.723183 | -1.811871 |    |           |           |           |
| C  | 6.767305  | -1.489140 | -2.056265 | C  | -2.385584 | -1.052342 | -1.364139 |
| H  | 6.963067  | 0.221688  | -3.355566 | C  | -1.043345 | -1.161533 | -1.912897 |
| C  | 4.552195  | -1.867572 | -1.163643 | C  | -3.132628 | 0.121508  | -1.800530 |
| C  | 5.887806  | -2.247208 | -1.274673 | C  | -0.545179 | -0.281304 | -2.856843 |
| H  | 7.812209  | -1.777589 | -2.150390 | H  | -0.478812 | -2.058703 | -1.669166 |
| H  | 3.860973  | -2.417264 | -0.530440 | C  | -2.596222 | 0.969843  | -2.799572 |
| H  | 6.243433  | -3.127533 | -0.745539 | C  | -1.334337 | 0.800913  | -3.333775 |
| C  | 2.587099  | -0.418194 | -1.742975 | H  | 0.440526  | -0.465758 | -3.282279 |
| O  | 1.777602  | -1.189251 | -2.254609 | H  | -3.222846 | 1.800279  | -3.113392 |
| H  | 3.588431  | 1.110306  | -3.925140 | H  | -0.949997 | 1.473940  | -4.095812 |
| C  | 4.129719  | 2.299902  | -2.212237 | C  | -4.391166 | 0.564924  | -1.228663 |
| C  | 4.912102  | 3.418959  | -1.906826 | O  | -5.113042 | 1.455452  | -1.645381 |
| C  | 3.049230  | 1.978764  | -1.374382 | C  | -4.186805 | -2.361029 | -0.140222 |
| C  | 4.639595  | 4.184740  | -0.765288 | C  | -4.651249 | -3.676468 | 0.128111  |
| H  | 5.738943  | 3.686923  | -2.564055 | C  | -5.136880 | -1.325903 | 0.047300  |
| C  | 2.782572  | 2.719476  | -0.223025 | C  | -5.965519 | -3.939725 | 0.497081  |
| C  | 3.593693  | 3.814968  | 0.086115  | H  | -3.944156 | -4.497848 | 0.022564  |
| H  | 5.257593  | 5.048319  | -0.530351 | C  | -6.462561 | -1.585850 | 0.381839  |
| H  | 2.014395  | 2.384961  | 0.465359  | C  | -6.893331 | -2.896393 | 0.612084  |
| H  | 3.423799  | 4.350399  | 1.014051  | H  | -6.273689 | -4.966611 | 0.688171  |
| O  | 4.173182  | 0.194693  | 1.361521  | H  | -7.131670 | -0.738081 | 0.502009  |
| C  | 4.005336  | 1.186298  | 2.279601  | H  | -7.924107 | -3.094465 | 0.896269  |
| O  | 5.044716  | 1.907236  | 2.510888  | C  | -2.848934 | -2.117692 | -0.589225 |
| O  | 2.863696  | 1.364002  | 2.793036  | H  | -2.159236 | -2.953285 | -0.473988 |
| K  | 6.124162  | 1.271209  | 0.328292  | O  | -4.722668 | 0.002445  | 0.034620  |
| C  | -0.867882 | -0.435189 | -0.522093 | Pd | 0.720857  | 0.034126  | -0.391499 |
| H  | -0.312111 | -0.526598 | -1.462119 | P  | 2.319498  | -1.421959 | 0.438962  |
| H  | -0.769994 | 0.615799  | -0.220432 | P  | 0.505993  | 2.064117  | 0.726915  |
| C  | -2.347035 | -0.793957 | -0.704081 | C  | 2.006433  | -3.252167 | 0.518632  |
| H  | -2.863667 | -0.743860 | 0.261194  | C  | 1.149955  | -3.789367 | 1.496264  |
| H  | -2.446504 | -1.830145 | -1.054778 | H  | 0.732643  | -3.146815 | 2.266320  |
| C  | -3.040207 | 0.154540  | -1.695223 | C  | 0.806259  | -5.142121 | 1.488447  |
| H  | -2.517254 | 0.110135  | -2.660998 | H  | 0.139823  | -5.529751 | 2.255273  |
| H  | -2.932410 | 1.187315  | -1.340268 | C  | 1.305610  | -5.991194 | 0.499239  |
| C  | -4.530534 | -0.136730 | -1.951870 | H  | 1.034177  | -7.043845 | 0.490429  |

|   |           |           |           |   |           |           |           |
|---|-----------|-----------|-----------|---|-----------|-----------|-----------|
| C | 2.146073  | -5.469927 | -0.487164 | H | -2.190421 | 0.972473  | 0.854694  |
| H | 2.536858  | -6.117759 | -1.268769 | C | 1.119560  | 3.561209  | -0.186605 |
| C | 2.487838  | -4.117475 | -0.480049 | C | 2.100111  | 4.446985  | 0.285133  |
| H | 3.140613  | -3.730641 | -1.257728 | H | 2.553731  | 4.293518  | 1.259743  |
| C | 4.074909  | -1.385108 | -0.181632 | C | 2.513211  | 5.538208  | -0.485987 |
| C | 4.386856  | -0.514723 | -1.235917 | H | 3.278552  | 6.209723  | -0.102242 |
| H | 3.591296  | 0.090231  | -1.665600 | C | 1.945754  | 5.766981  | -1.739150 |
| C | 5.692460  | -0.421237 | -1.726954 | H | 2.265262  | 6.616521  | -2.338402 |
| H | 5.913601  | 0.258708  | -2.546150 | C | 0.968950  | 4.890667  | -2.222360 |
| C | 6.706777  | -1.199455 | -1.167992 | H | 0.523563  | 5.056077  | -3.200551 |
| H | 7.723090  | -1.129407 | -1.548763 | C | 0.569102  | 3.793753  | -1.460798 |
| C | 6.410660  | -2.072827 | -0.117109 | H | -0.170937 | 3.100455  | -1.855994 |
| H | 7.196593  | -2.684014 | 0.321150  | C | 1.593417  | 2.033473  | 2.260802  |
| C | 5.106391  | -2.163935 | 0.370327  | H | 1.070613  | 1.359841  | 2.950292  |
| H | 4.885303  | -2.856228 | 1.178824  | H | 1.604323  | 3.013095  | 2.755685  |
| C | -1.068374 | 2.712501  | 1.468582  | C | 3.031731  | 1.531724  | 1.979683  |
| C | -1.144580 | 3.955150  | 2.120811  | H | 3.751079  | 2.279619  | 2.340703  |
| H | -0.265151 | 4.592248  | 2.182601  | H | 3.196382  | 1.455630  | 0.898443  |
| C | -2.347986 | 4.394192  | 2.671477  | C | 3.415621  | 0.187778  | 2.629603  |
| H | -2.394490 | 5.360561  | 3.169847  | H | 3.381166  | 0.301725  | 3.723942  |
| C | -3.495360 | 3.600403  | 2.569334  | H | 4.465168  | -0.014947 | 2.379428  |
| H | -4.437003 | 3.950558  | 2.986471  | C | 2.580459  | -1.060776 | 2.276854  |
| C | -3.434650 | 2.368669  | 1.917896  | H | 3.038635  | -1.930215 | 2.767313  |
| H | -4.318842 | 1.750781  | 1.796311  | H | 1.569289  | -0.962160 | 2.688366  |
| C | -2.224617 | 1.926207  | 1.373232  |   |           |           |           |
